# Supplementary material for: Self-assembling modified neuropeptide S enhances nose-to-brain penetration and exerts a prolonged anxiolytic-like effect
Source: Royal Society of Chemistry journal article supplement (doi:10.1039/d1bm00380a), 2021-01-01

## **Supporting Information**

### **Self-assembling Modified Neuropeptide S Enhances Nose-to-Brain Penetration and Exerts a Prolong Anxiolytic-like Effect**

Shu Li<sup>a</sup>, Chen Guo<sup>a</sup>, Xingjiao Zhang<sup>a</sup>, Xiaojing Liu<sup>a</sup>, Jing Mu<sup>a</sup>, Chunxia Liu<sup>a</sup>, Yali Peng<sup>a</sup>, Min Chang<sup>\*a</sup>

<sup>a</sup> Institute of Biochemistry and Molecular Biology, School of Life Sciences, Lanzhou University, Lanzhou 730000, China.

**\*Corresponding author:**

Min Chang

E-mail addresses: changmin@lzu.edu.cn

A

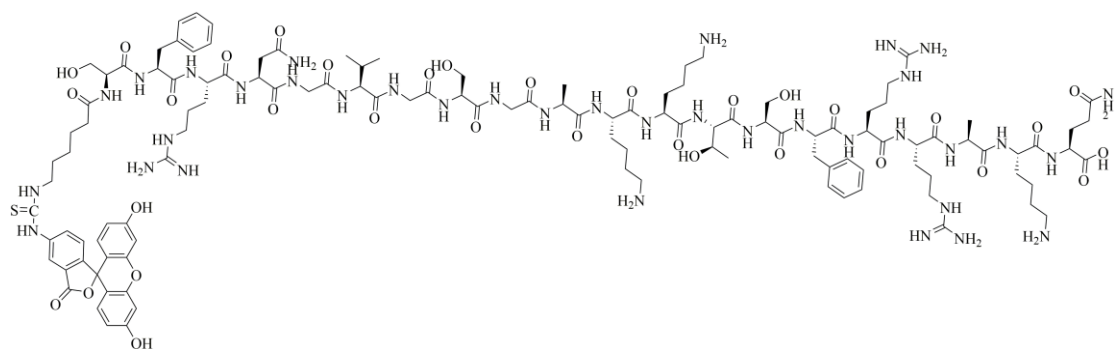

FITC-mNPS

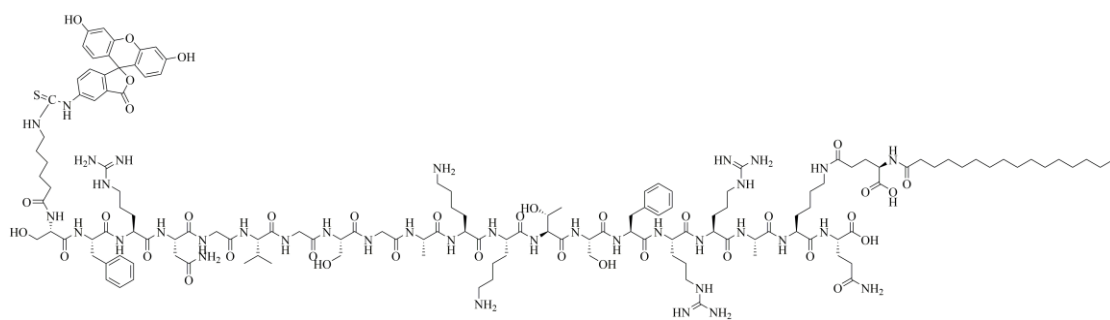

FITC-M-1

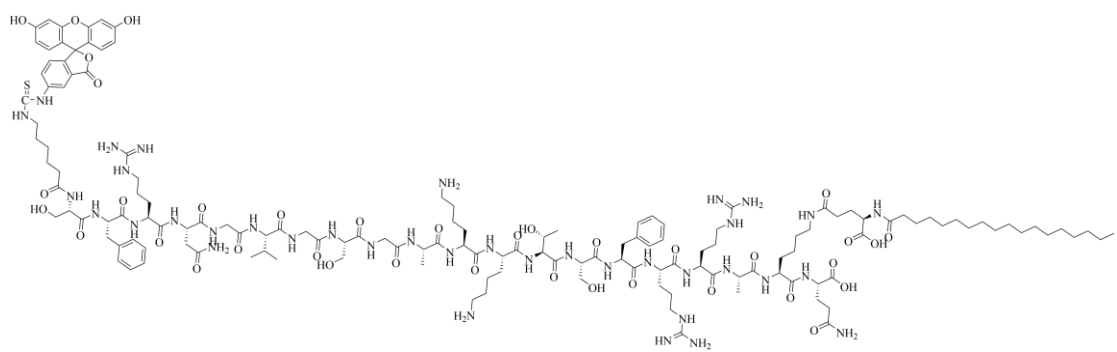

FITC-M-2

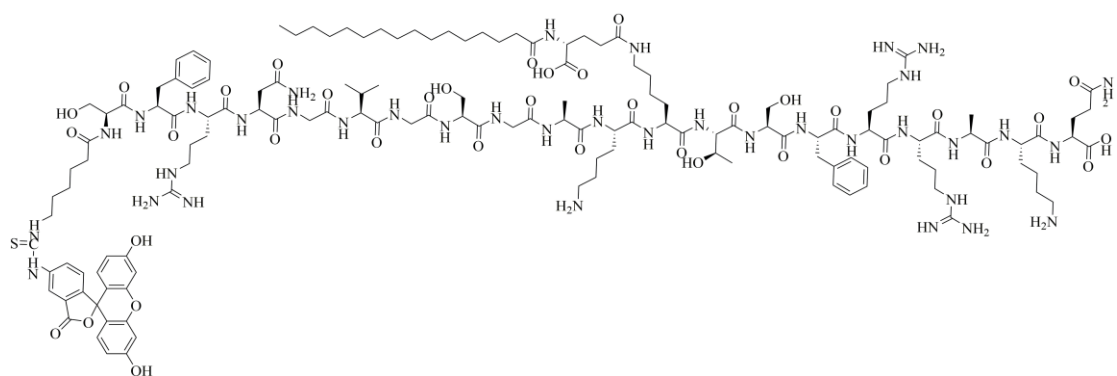

FITC-M-3

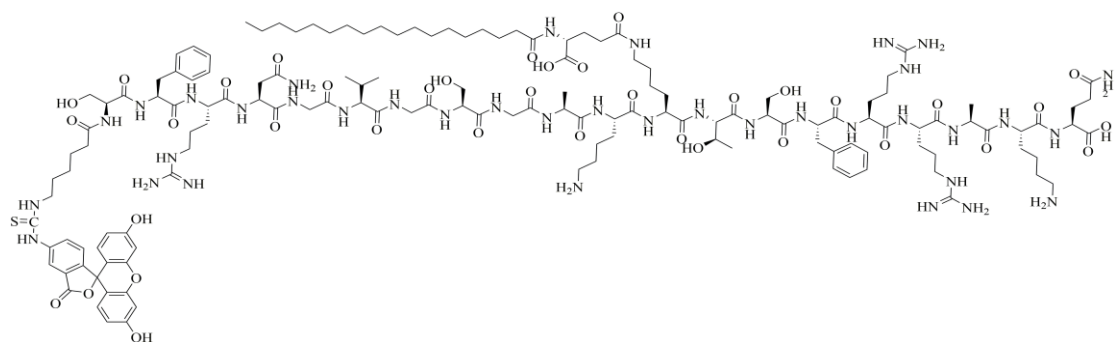

FITC-M-4

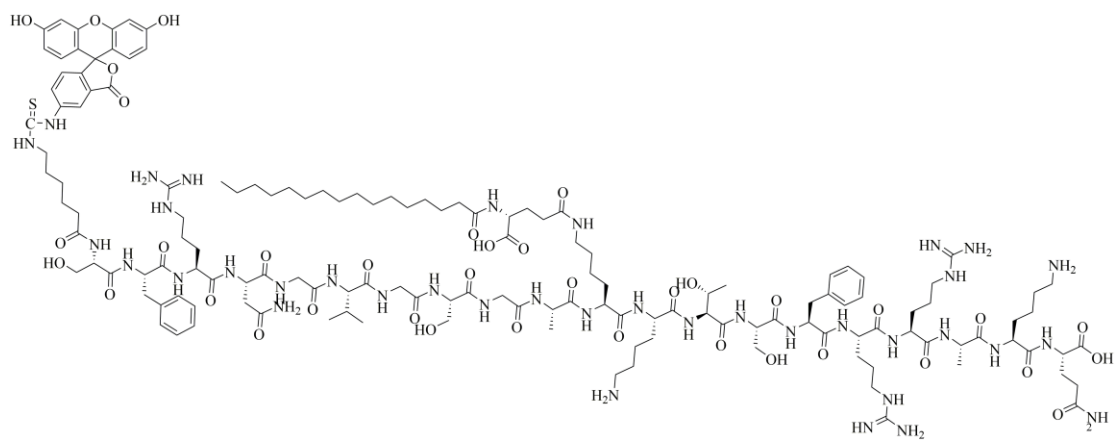

FITC-M-5

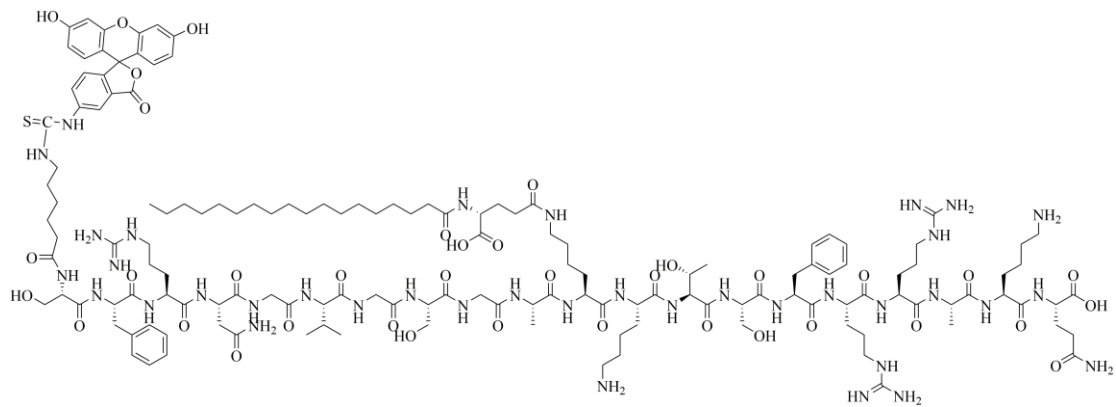

FITC-M-6

**Fig. S1** Chemical structures of FITC labelled peptides.

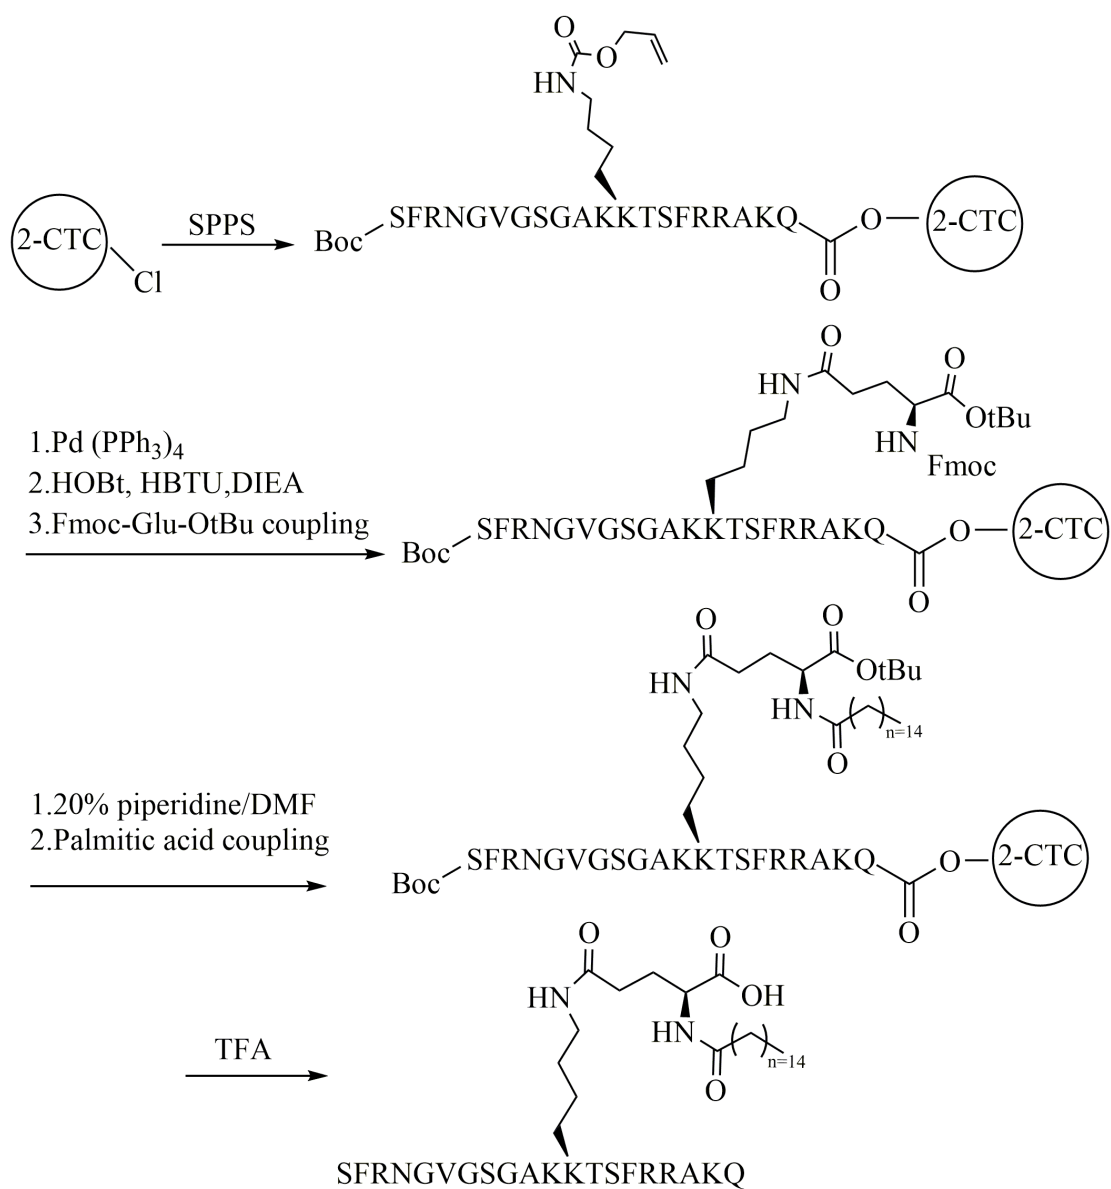

**Scheme S1.** Synthesis procedures of M-3.

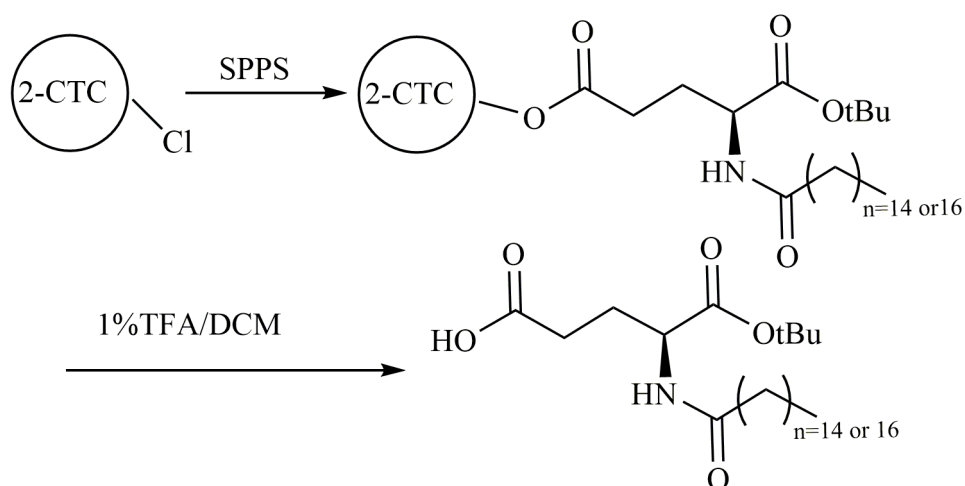

**Scheme S2.** Synthesis procedures of  $\gamma\text{Glu-C16}$  or  $\gamma\text{Glu-C18}$ .

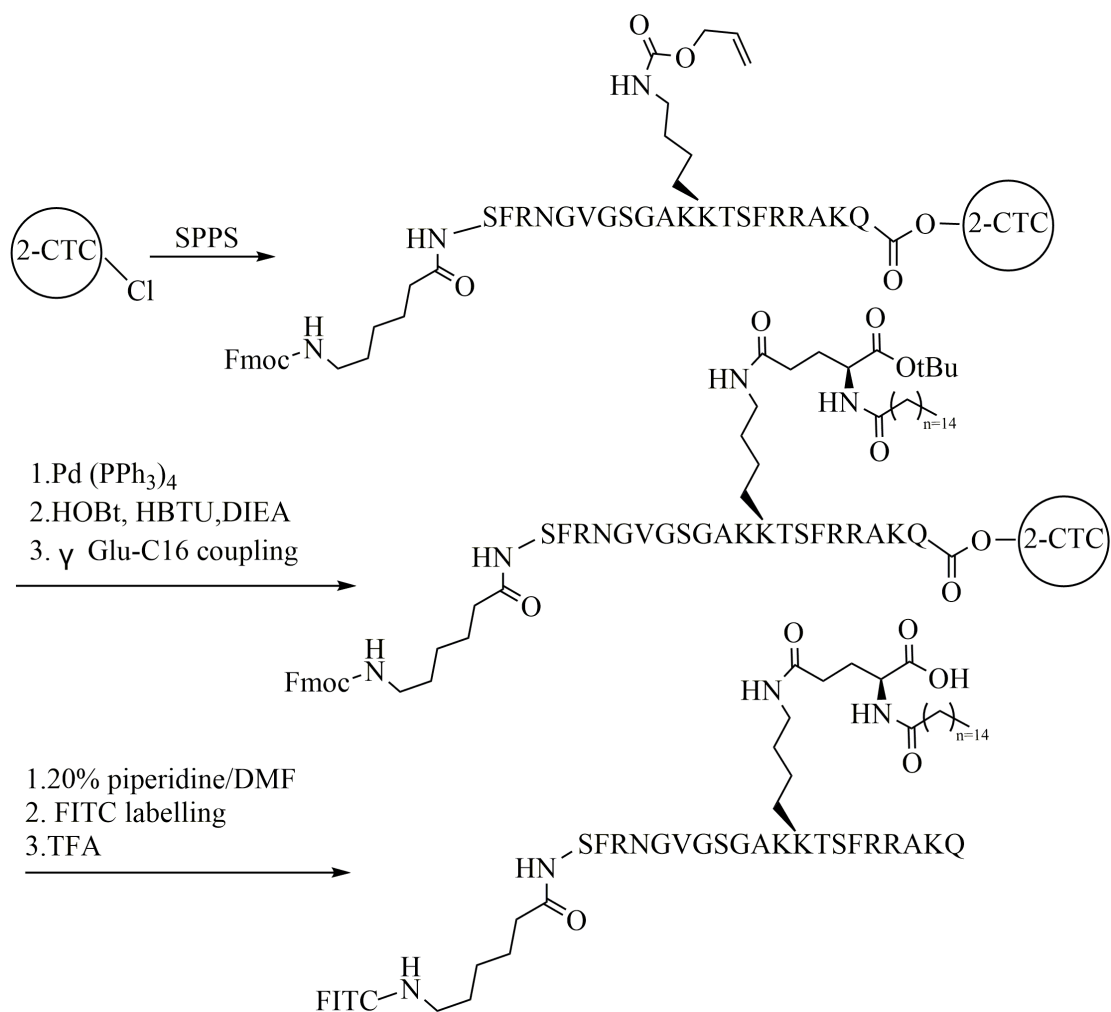

**Scheme S3.** Synthesis procedures of FITC labelling M-3.

**Table S1.** Analytical Data for mNPS and the new peptides.

| Peptides ID | $t_R$ [min.] | analyt. HPLC | MS              |               |
|-------------|--------------|--------------|-----------------|---------------|
|             |              |              | Found $[M+H]^+$ | Calcd $[M]^+$ |
| mNPS        | 12.612       |              | 2182.1501       | 2181.19       |
| M-1         | 22.574       |              | 2551.2058       | 2550.48       |
| M-2         | 23.959       |              | 2578.4410       | 2577.51       |
| M-3         | 21.417       |              | 2550.4480       | 2549.48       |
| M-4         | 22.177       |              | 2578.5093       | 2577.51       |
| M-5         | 20.852       |              | 2550.4499       | 2549.48       |
| M-6         | 22.946       |              | 2578.5118       | 2577.51       |

**Table S2.** Physical characterization of the mNPS and the new peptides.

Each value represents average and standard deviation (n=3).

| Peptides ID | Size (nm) | Zeta potential (mV) |
|-------------|-----------|---------------------|
| mNPS        | -         | -                   |
| M-1         | -         | -                   |
| M-2         | 283±7.9   | 43±2.4              |
| M-3         | 86±4.9    | 47±2.3              |
| M-4         | 160±10    | 50±4.8              |
| M-5         | -         | -                   |
| M-6         | 180±4.7   | 34±3.1              |

**Table S3:** Stability of mNPS and the new peptides in brain homogenate

| Peptides ID | $t_{1/2}^{[a]} \pm \text{sem}^{[b]}$ (Min) |
|-------------|--------------------------------------------|
| mNPS        | 11.8 $\pm$ 4.0                             |
| M-1         | 50.3 $\pm$ 5.1                             |
| M-2         | 48 $\pm$ 9.4                               |
| M-3         | 525 $\pm$ 31.2                             |
| M-4         | 1193.9 $\pm$ 23.6                          |
| M-5         | 39.7 $\pm$ 6.4                             |
| M-6         | 52.6 $\pm$ 6.8                             |

[a]=Time of the remaining 50% when peptides degradation;

[b]=standard error of the mean.

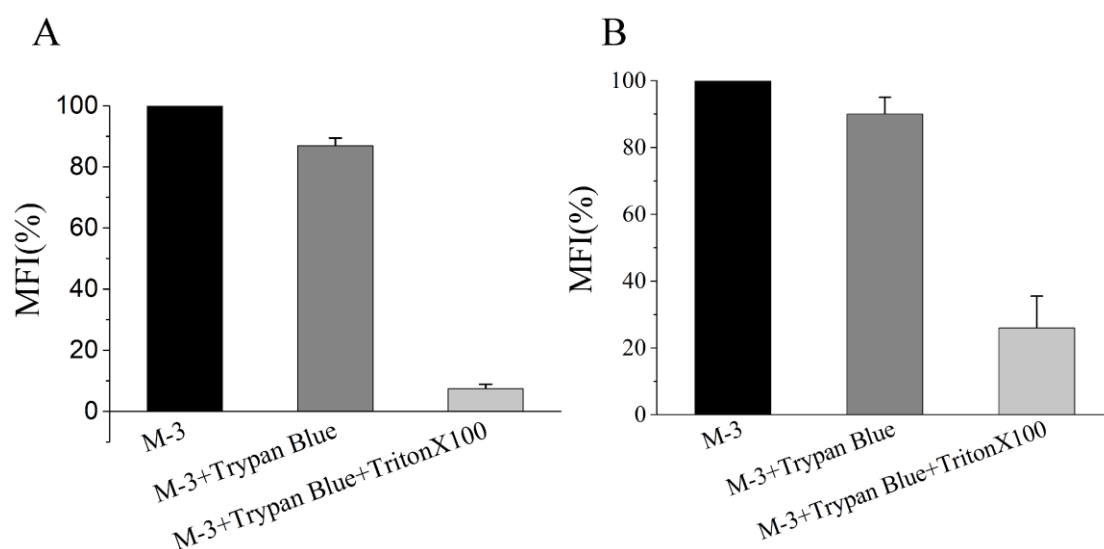

**Fig. S2** Relative mean fluorescence intensity of 5  $\mu$ M FITC labeled M-3 in the presence and absence of Trypan blue and Triton-X100 in HeLa cells (A) and U87 cells (B) measured by a flow cytometer.

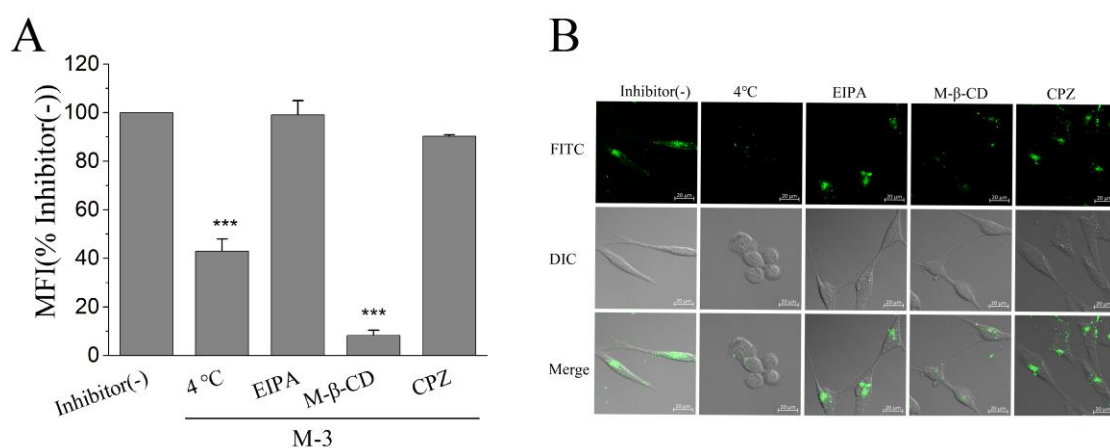

**Fig. S3** Relative mean fluorescence intensity(A) of 5  $\mu$ M FITC labeled M-3 in U87 cells in the presence of endocytosis inhibitors or at 4 °C and Confocal images of cellular uptake of 5  $\mu$ M FITC labeled M-3 by U87 cells in the presence of endocytosis inhibitors or at 4 °C (B). \*\*\*  $p < 0.001$ , \*\*  $p < 0.01$ , versus inhibitor (-) group respectively. Bar = 20  $\mu$ m.

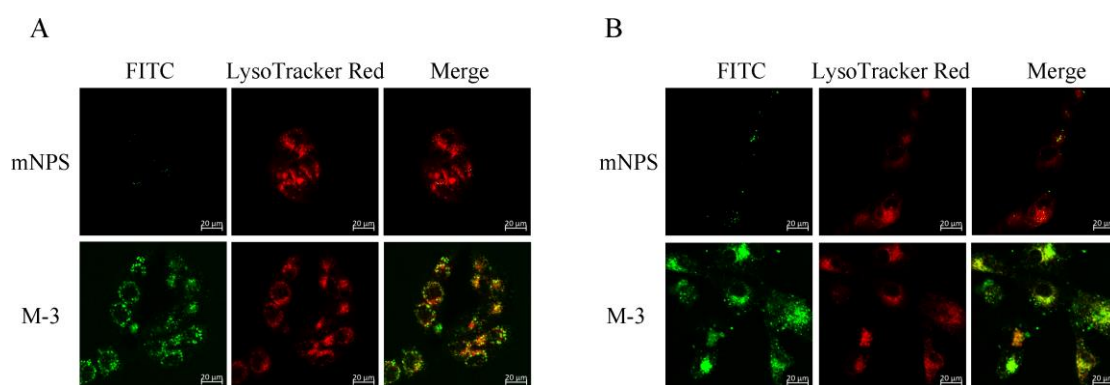

**Fig. S4** Co-localization of mNPS or M-3 and lysosome in HeLa cells (A) and U87 cells (B). HeLa cells and U87 cells were incubated with 5  $\mu$ M mNPS or M-3 for 2 h respectively, followed by LysoTracker Red staining. The images were obtained by confocal microscope. Bar = 20  $\mu$ m.

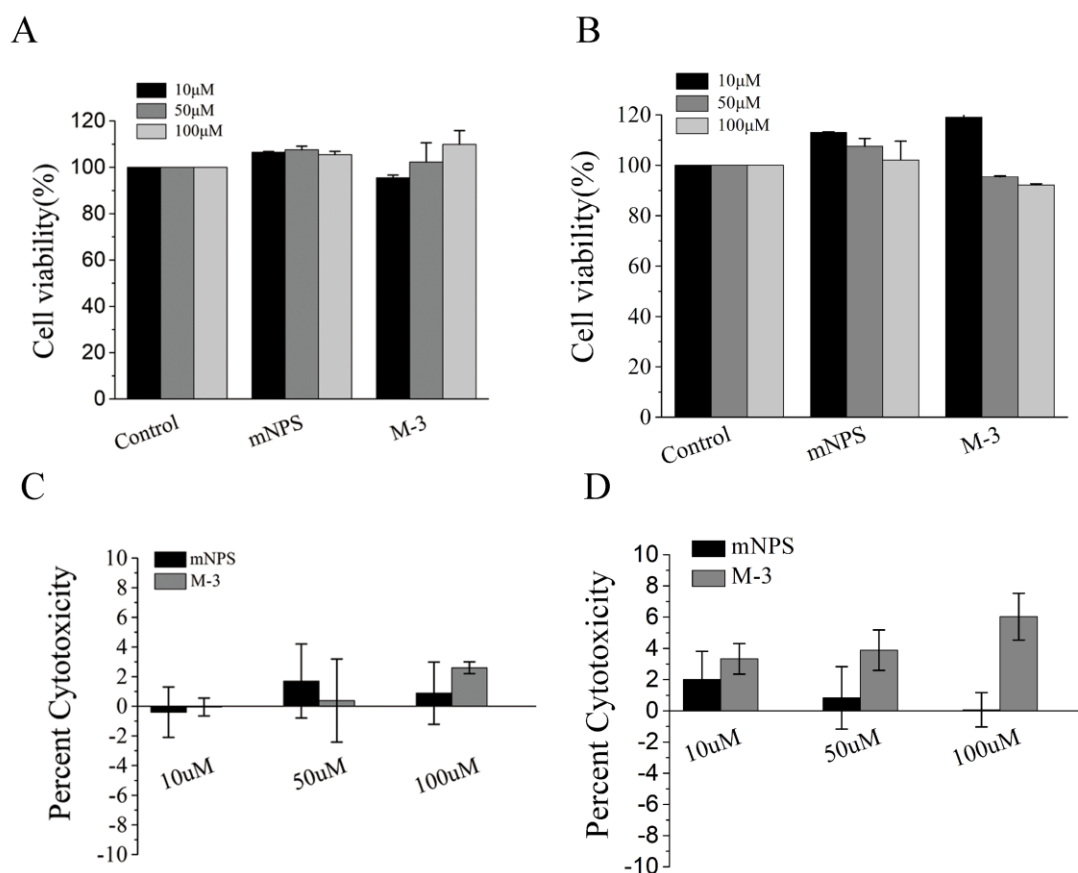

**Fig. S5** Cytotoxicity of mNPS and M-3 in U87 and HeLa cells. The cells were treated with DMSO (control), mNPS and M-3 at 10, 50, and 100  $\mu$ M for 24 h in U87 cells(A) and HeLa cells (B). LDH assay data of mNPS and M-3 in U87 cells (C) and HeLa cells (D) for 2 h.

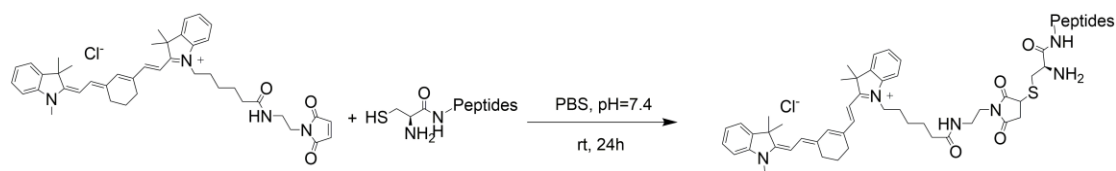

**Scheme S4.** Synthetic scheme for Cyanine7 maleimide labeled peptides.

mNPS

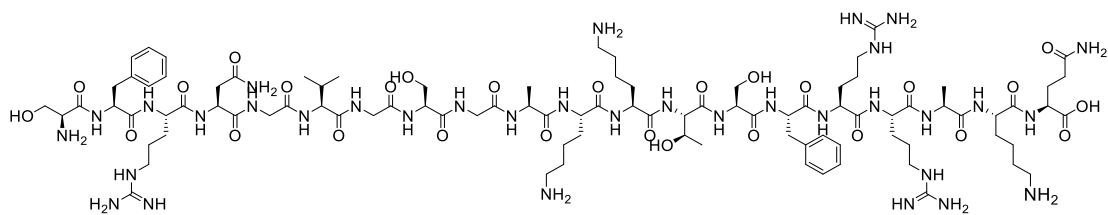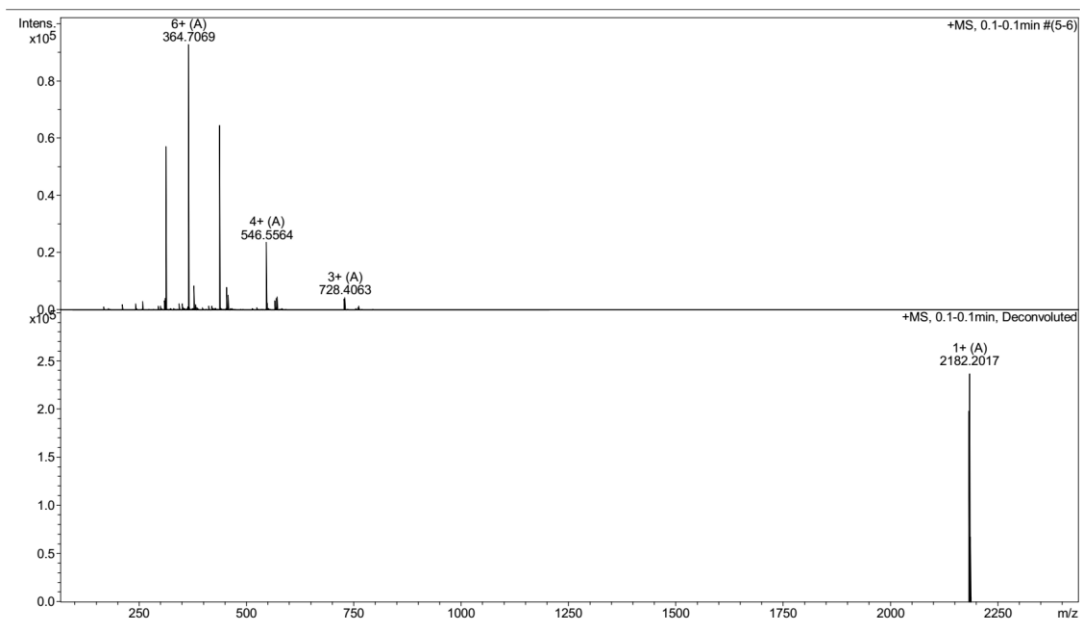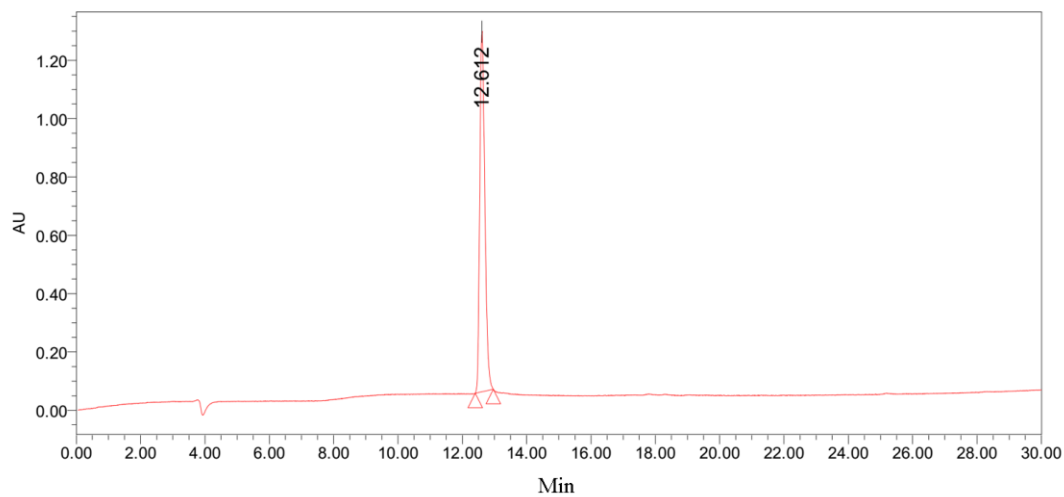

Peak results:

| Index Name |  | Time (Min) | Area ( $\mu V \cdot s$ ) | Height ( $\mu V$ ) | Area% (%) |
|------------|--|------------|--------------------------|--------------------|-----------|
| 1          |  | 12.612     | 13612237                 | 1236204            | 100       |

M-1

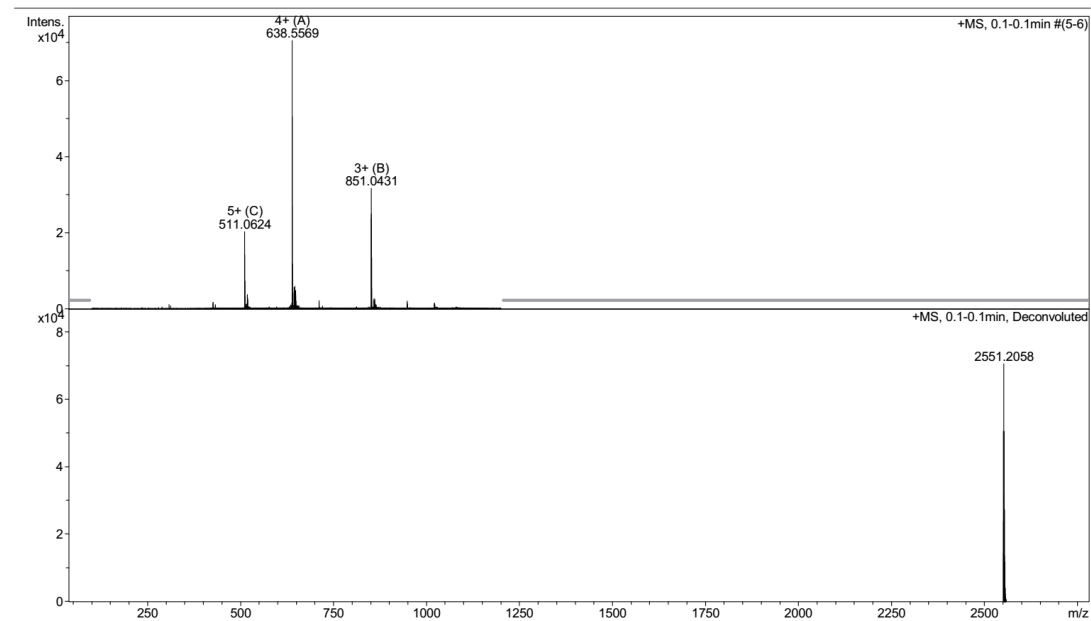

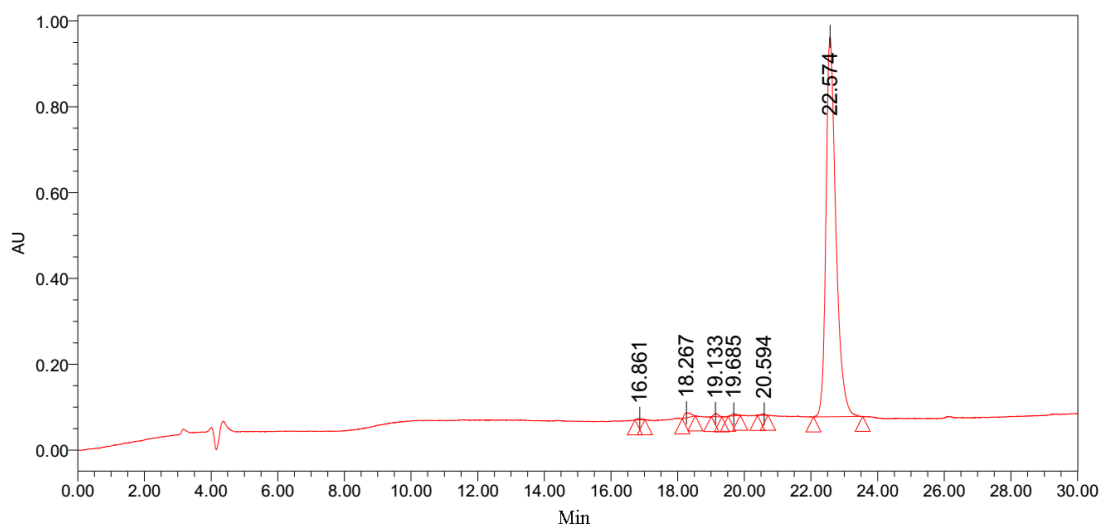

Peak results:

| Index | Name | Time (Min) | Area (μV.S) | Height (μV) | Area% (%) |
|-------|------|------------|-------------|-------------|-----------|
| 1     |      | 16.861     | 30998       | 3370        | 0.16      |
| 2     |      | 18.267     | 156400      | 11669       | 0.85      |
| 3     |      | 19.133     | 71280       | 7715        | 0.39      |
| 4     |      | 19.685     | 50461       | 4685        | 0.27      |
| 5     |      | 20.594     | 27668       | 3467        | 0.15      |
| 6     |      | 22.574     | 18164320    | 886213      | 98.18     |

M-2

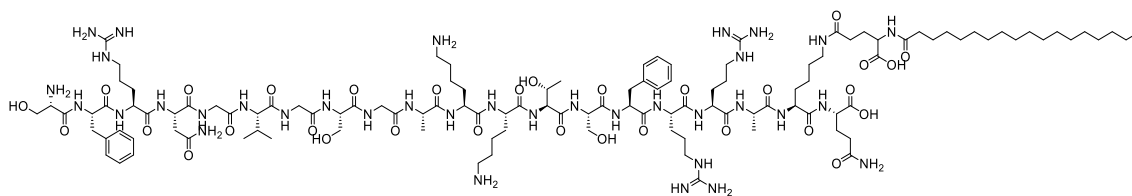

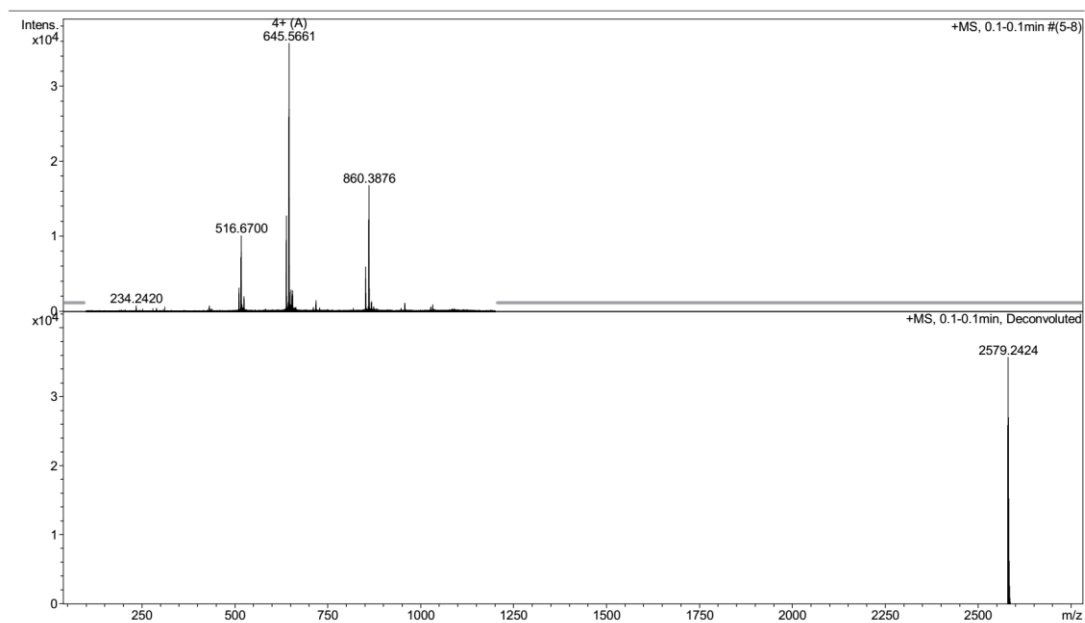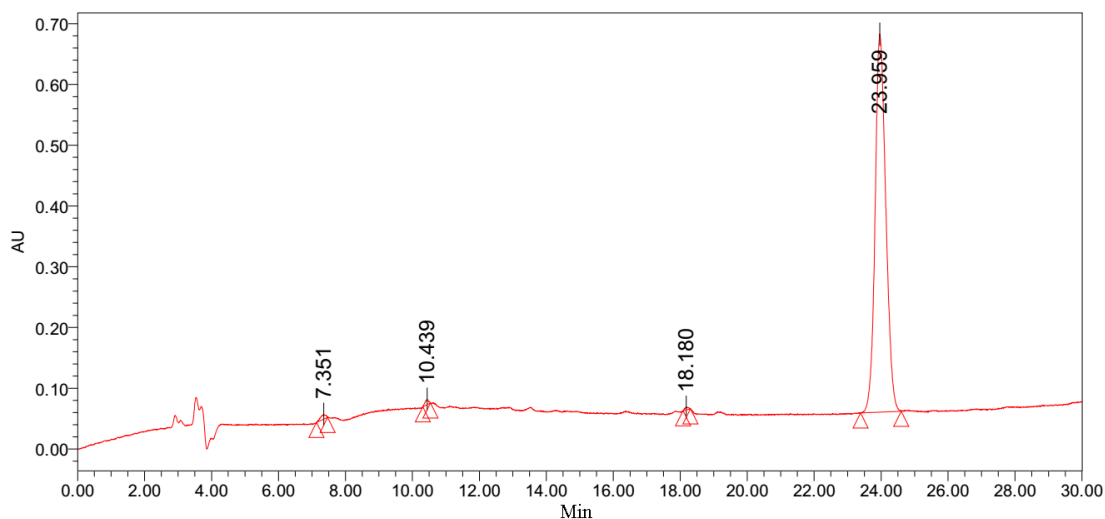

Peak results:

| Index | Name | Time (Min) | Area (μV.S) | Height (μV) | Area% (%) |
|-------|------|------------|-------------|-------------|-----------|
| 1     |      | 7.351      | 86589       | 8036        | 0.62      |
| 2     |      | 10.439     | 63975       | 9185        | 0.46      |
| 3     |      | 18.180     | 34673       | 4617        | 0.25      |
| 4     |      | 23.959     | 13776568    | 622433      | 98.67     |

M-3

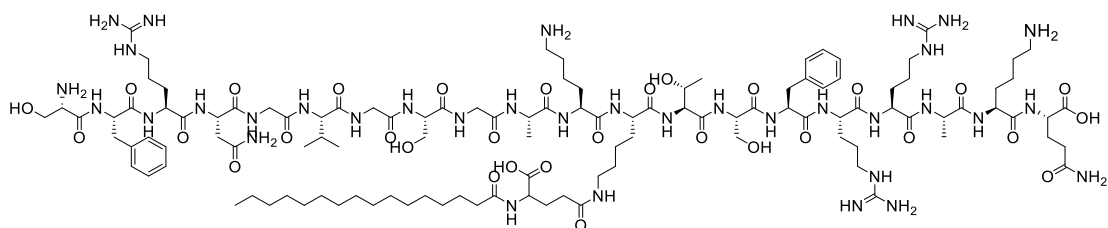

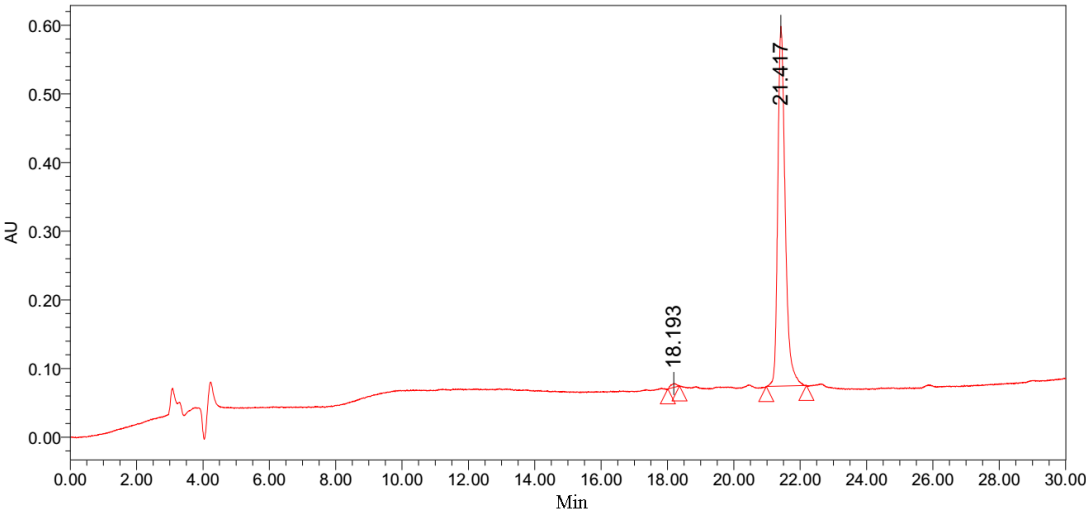

| Index | Name | Time (Min) | Area ( $\mu$ V.S) | Height ( $\mu$ V) | Area% (%) |
|-------|------|------------|-------------------|-------------------|-----------|
| 1     |      | 18.193     | 68531             | 5768              | 0.84      |
| 2     |      | 21.417     | 8114376           | 524195            | 99.16     |

[illegible]

### Analysis Info

Acquisition Date 3/25/2019 3:24:51 PM

Mass spectrum plot showing intensity versus  $m/z$ . The top panel is labeled "+MS, 0.1min #6" and the bottom panel is labeled "+MS, 0.1min, Deconvoluted".

The top panel shows peaks at  $m/z$  516.4669 (5+), 645.3334 (4+), and 860.1104 (3+). The bottom panel shows a single peak at  $m/z$  2577.3090 (1+).

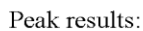M-5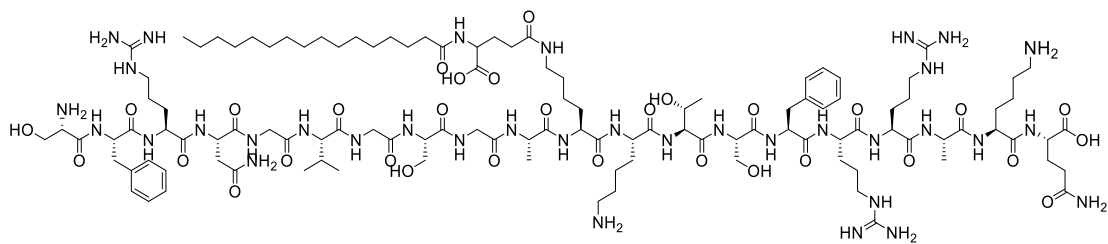

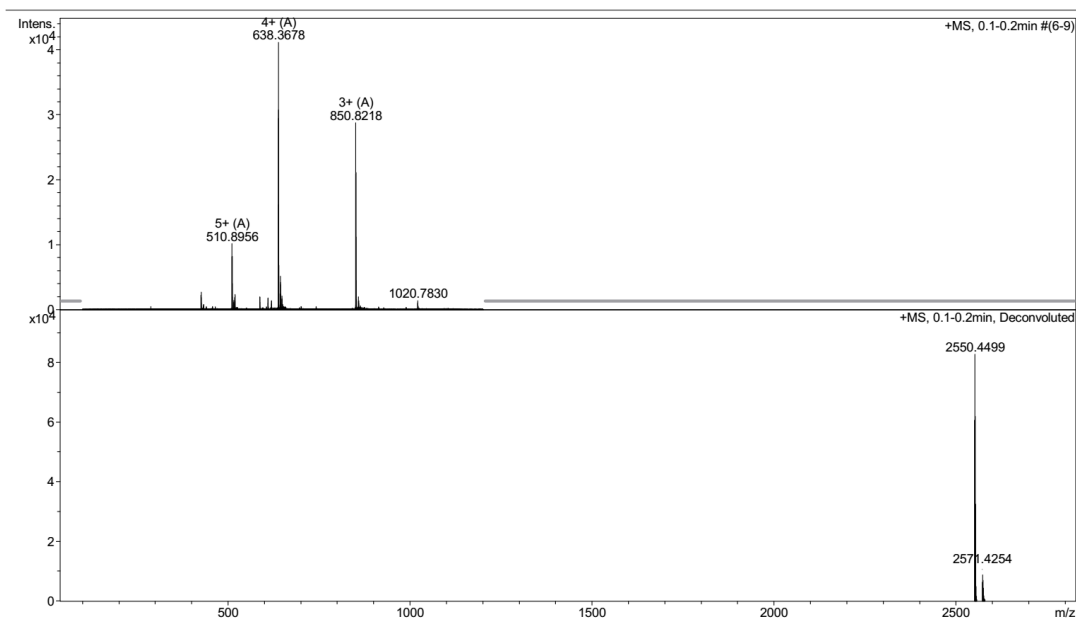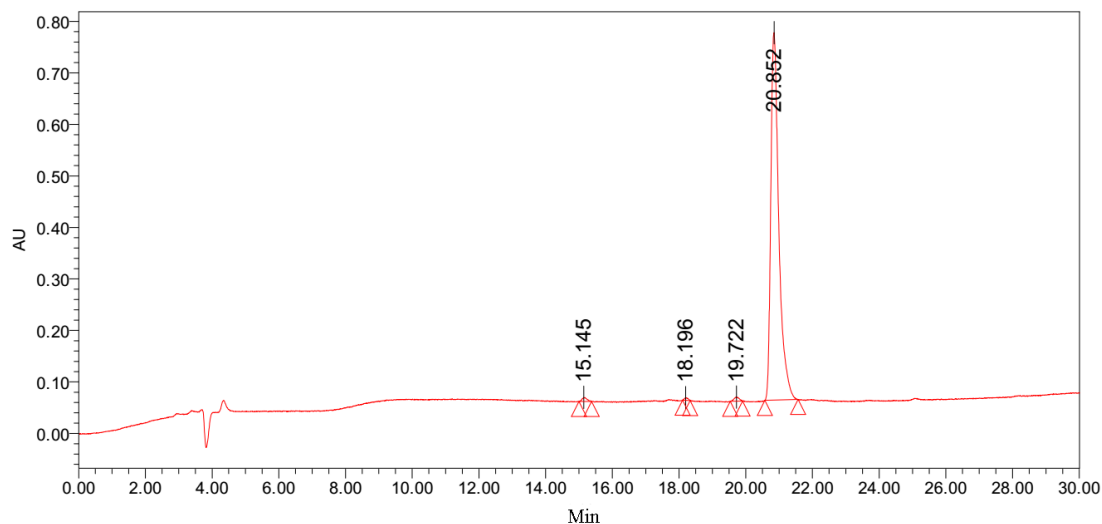

Peak results:

| Index | Name | Time (Min) | Area (μV.S) | Height (μV) | Area% (%) |
|-------|------|------------|-------------|-------------|-----------|
| 1     |      | 15.145     | 76884       | 7668        | 0.64      |
| 2     |      | 18.196     | 40687       | 5115        | 0.34      |
| 3     |      | 19.722     | 88457       | 8066        | 0.73      |
| 4     |      | 20.852     | 11875438    | 713631      | 98.29     |

M-6

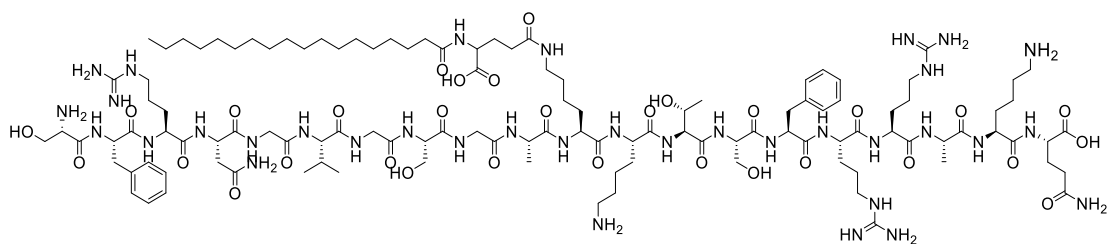

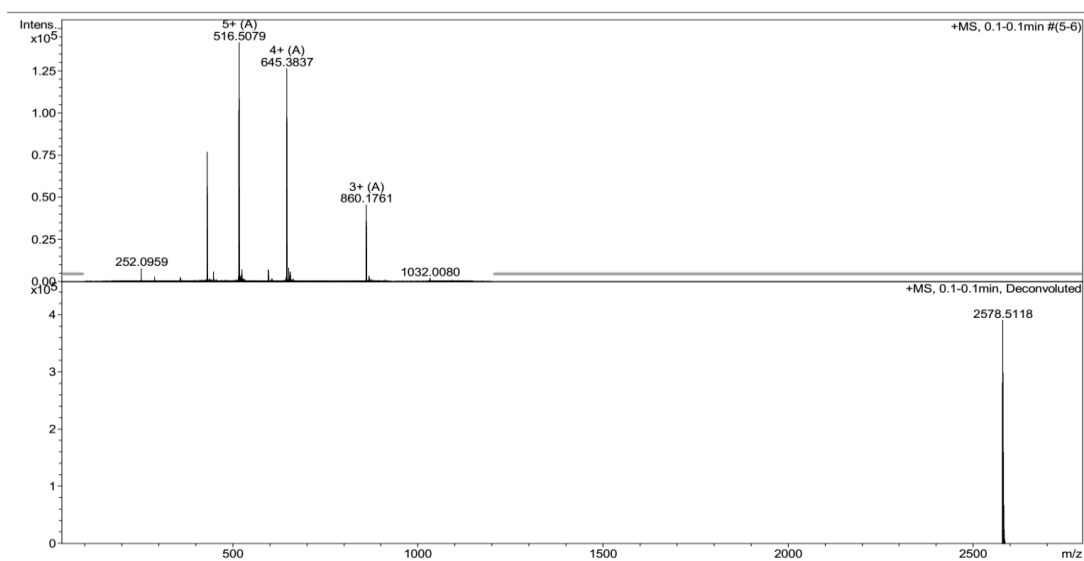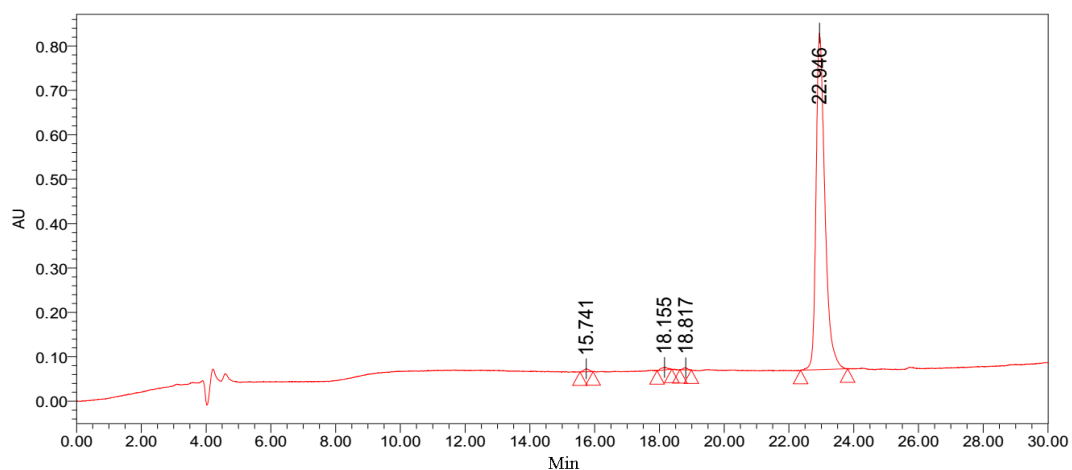

Peak results:

| Index | Name | Time (Min) | Area (μV.S) | Height (μV) | Area% (%) |
|-------|------|------------|-------------|-------------|-----------|
| 1     |      | 15.741     | 76164       | 6745        | 0.52      |
| 2     |      | 18.155     | 77225       | 5646        | 0.53      |
| 3     |      | 18.817     | 40198       | 4409        | 0.28      |
| 4     |      | 22.946     | 14353494    | 758043      | 98.67     |

## FITC-mNPS

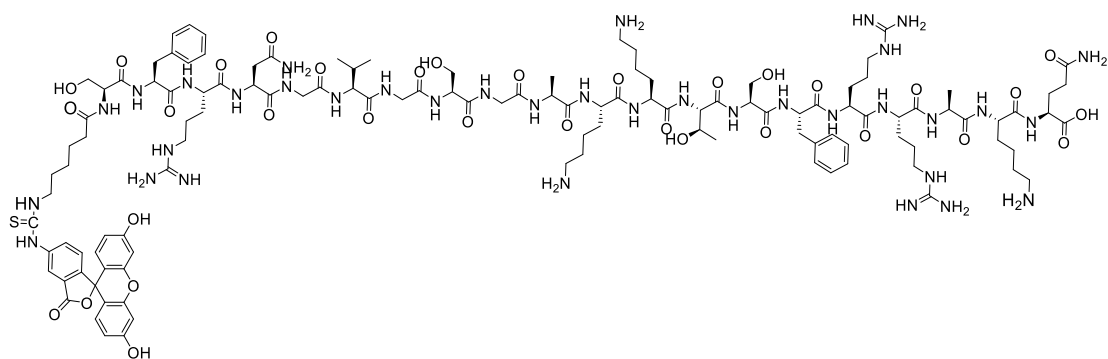

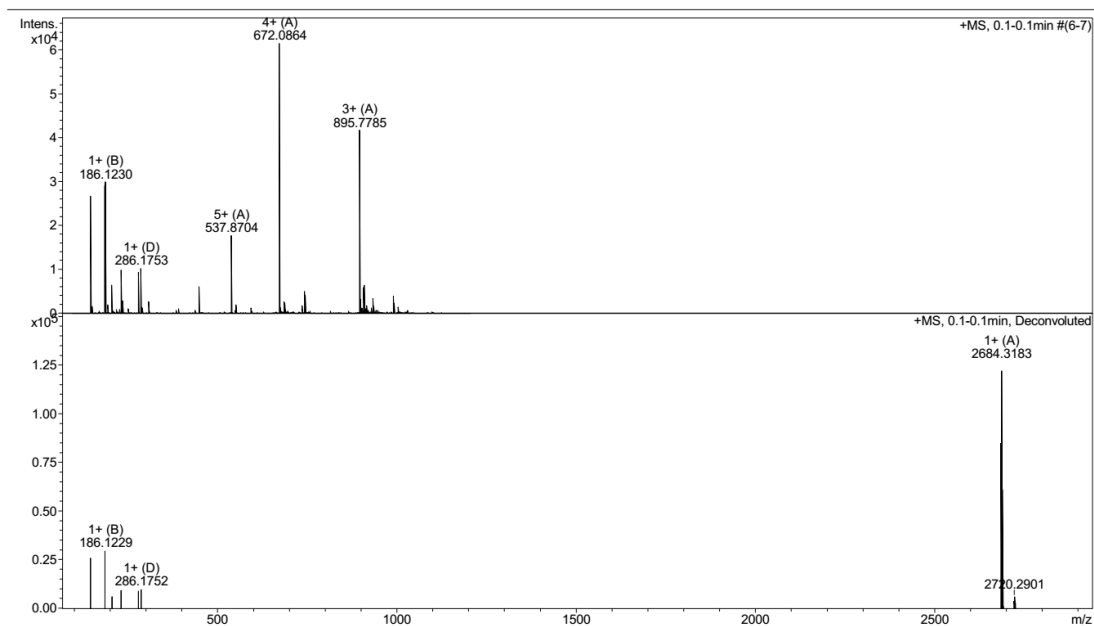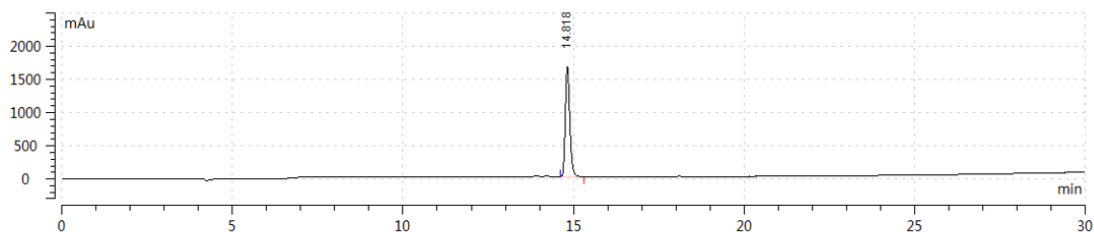

## FITC-M-1

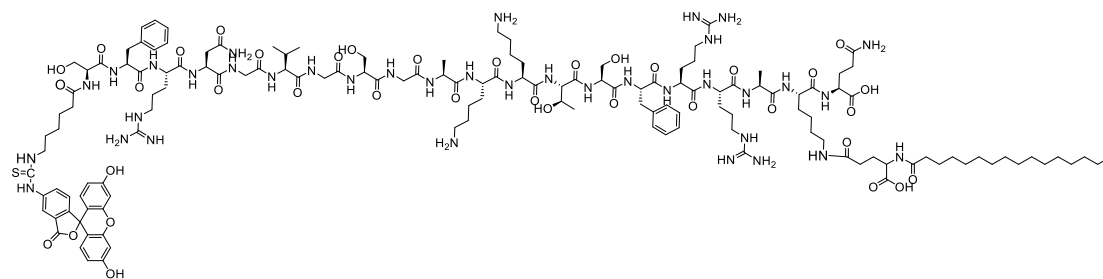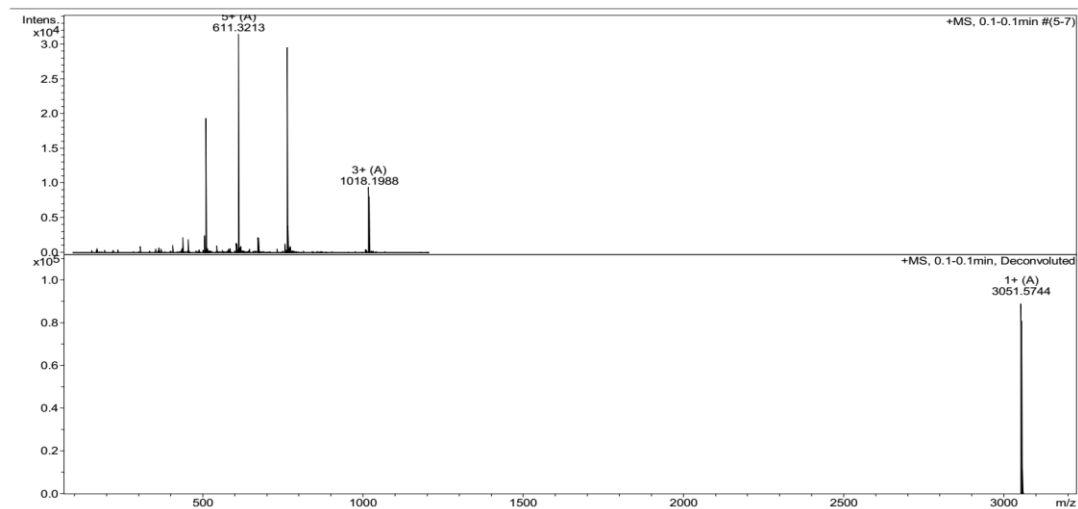

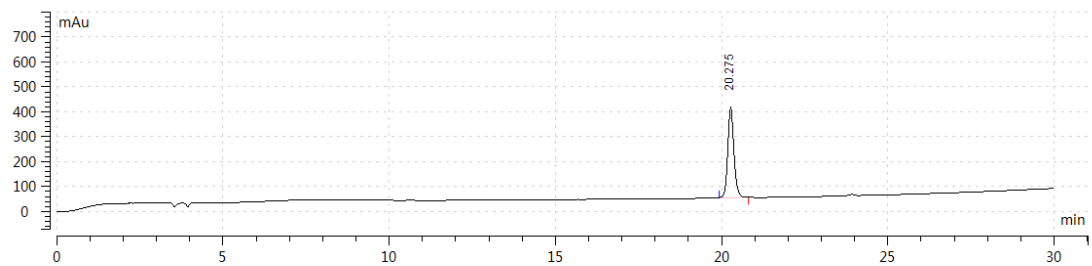

## FITC-M-2

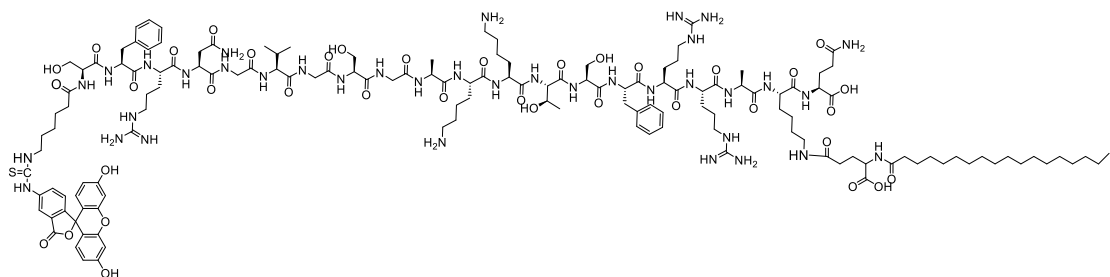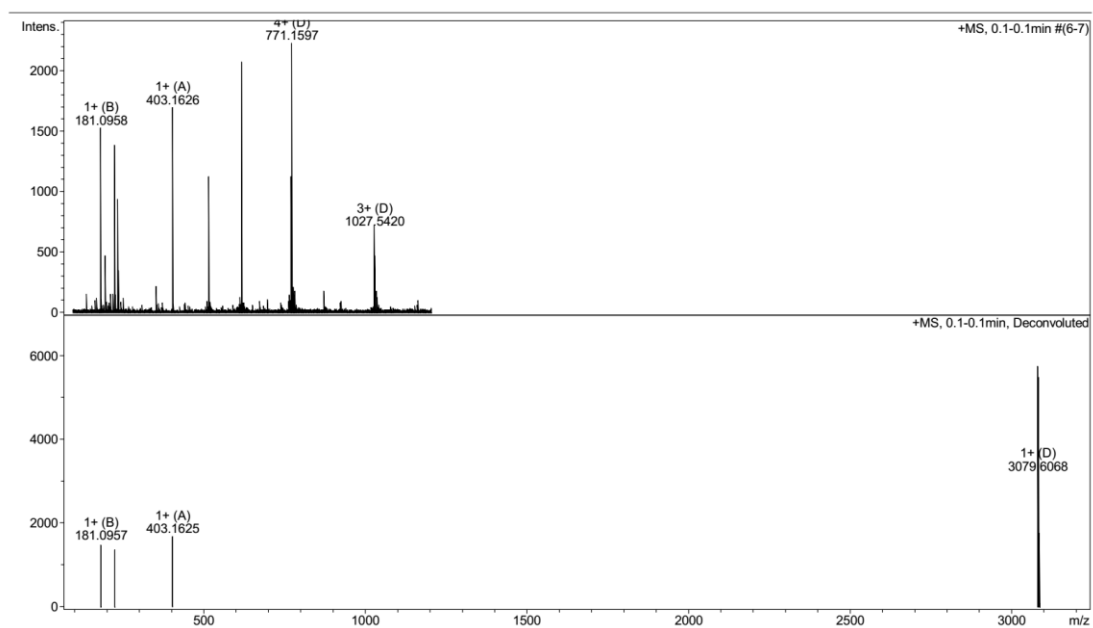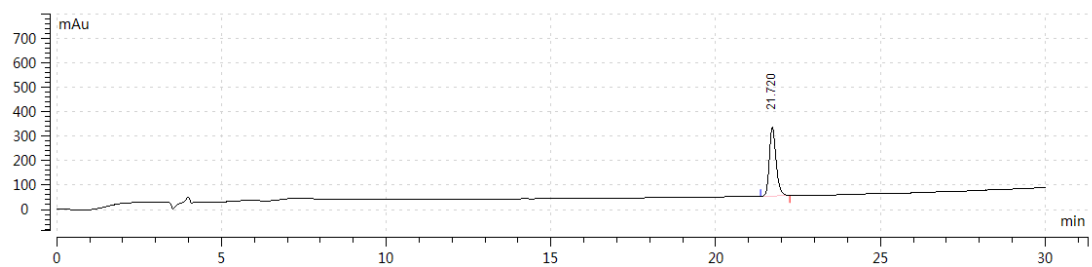

# FITC-M-3

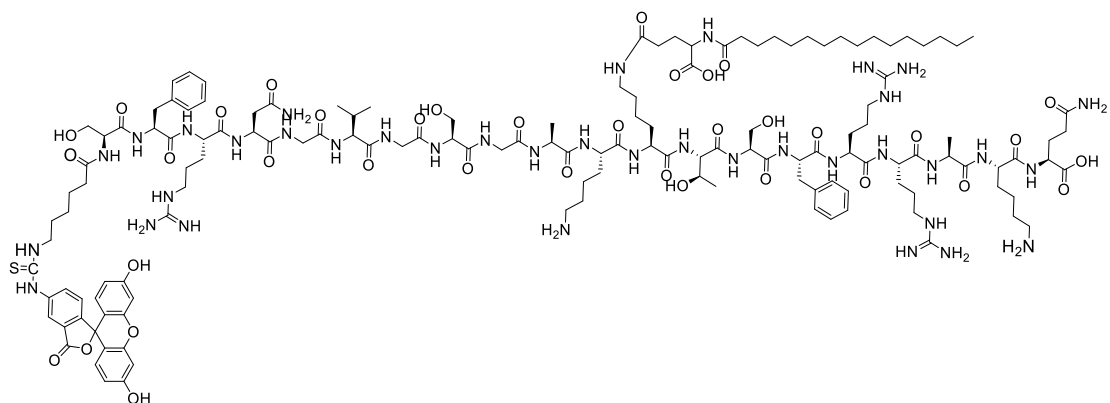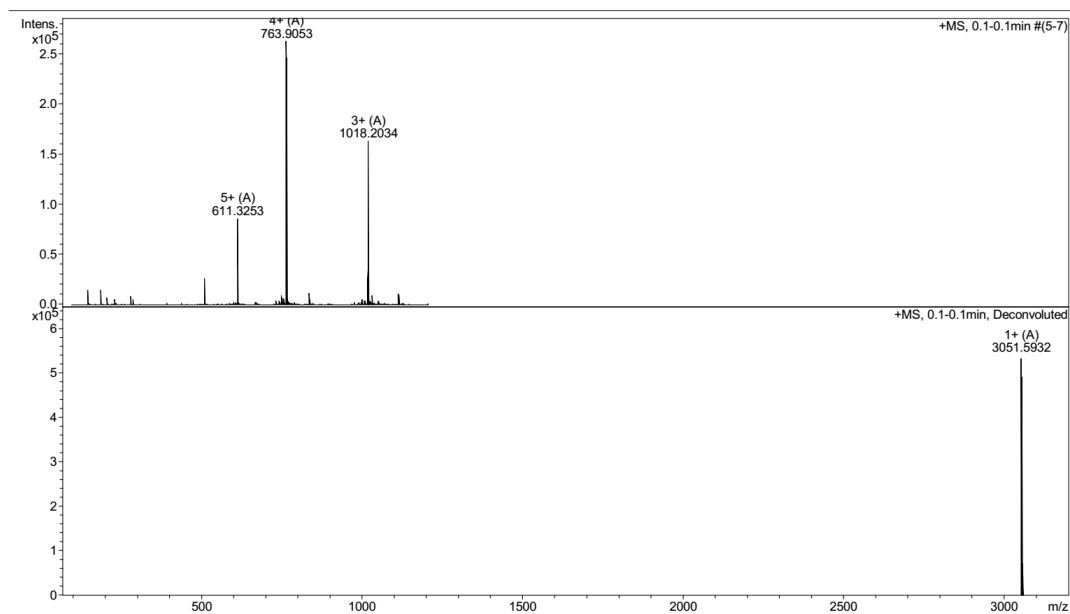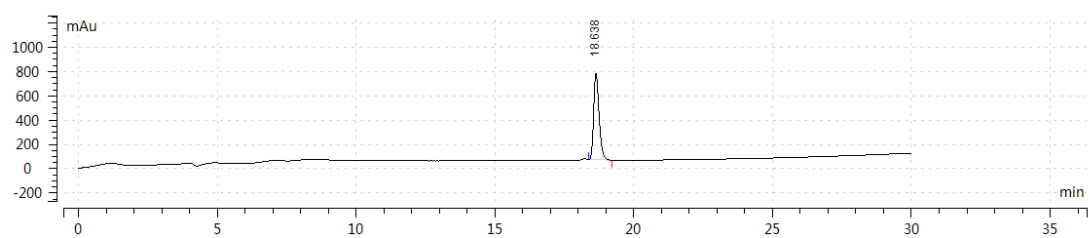

# FITC-M-4

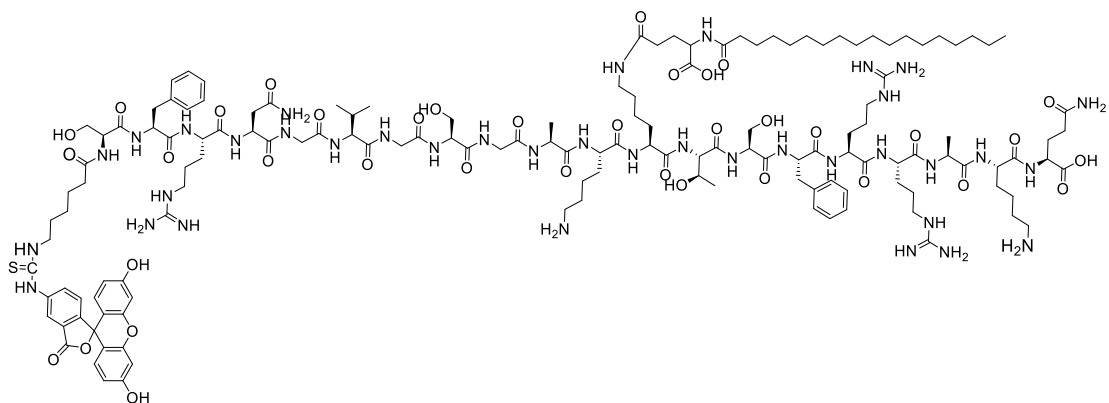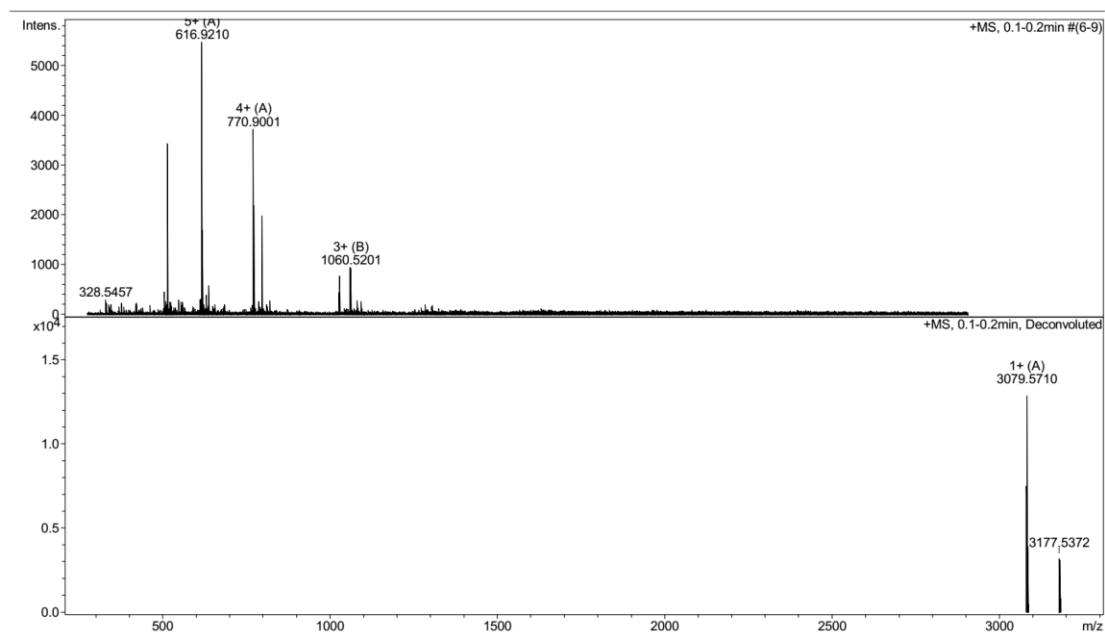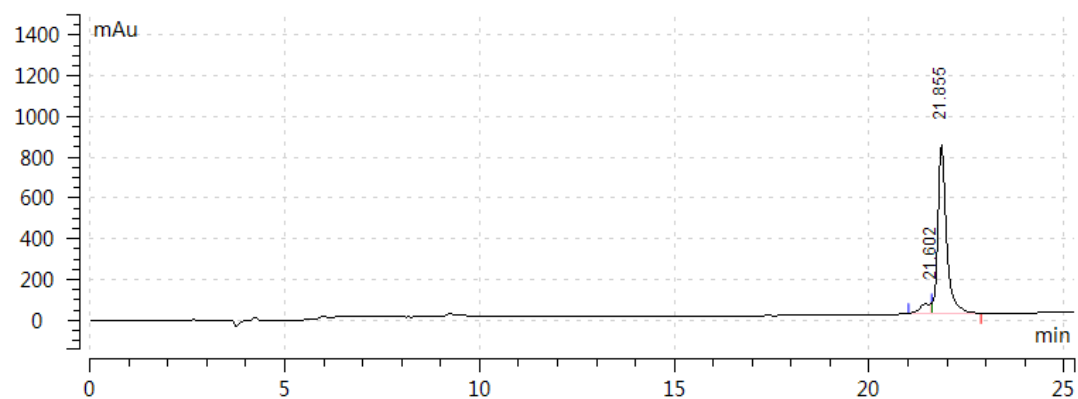

# FITC-M-5

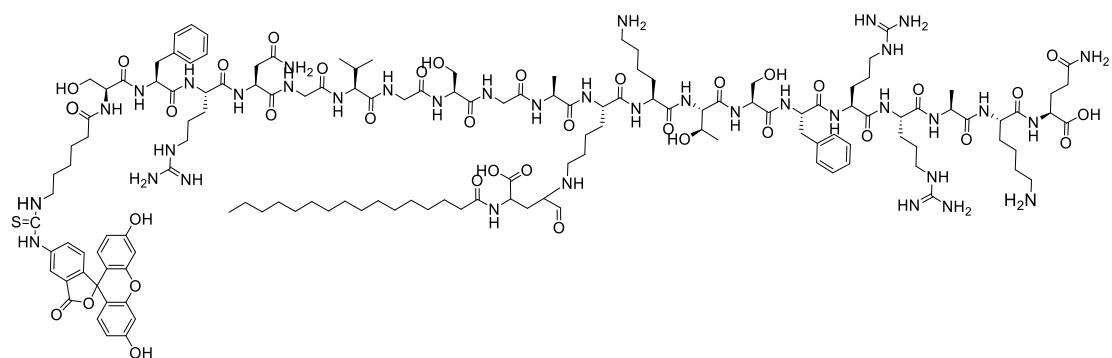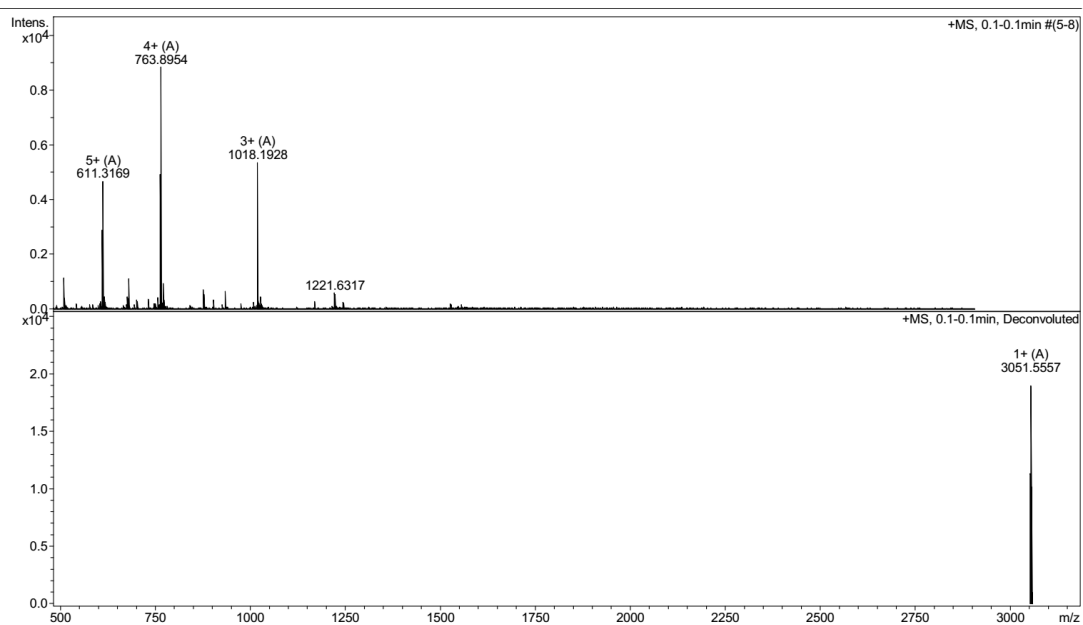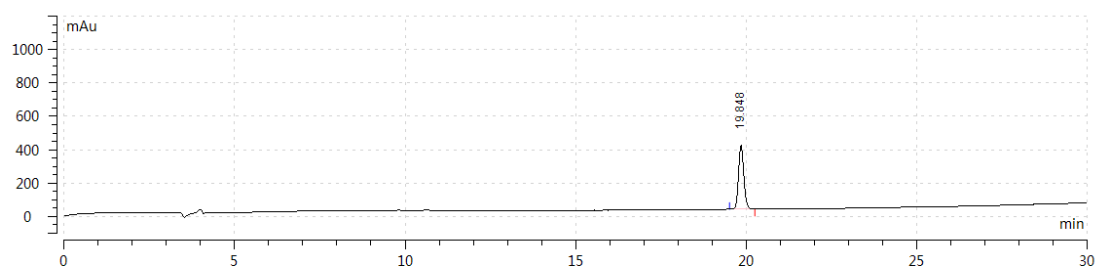

# FITC-M-6

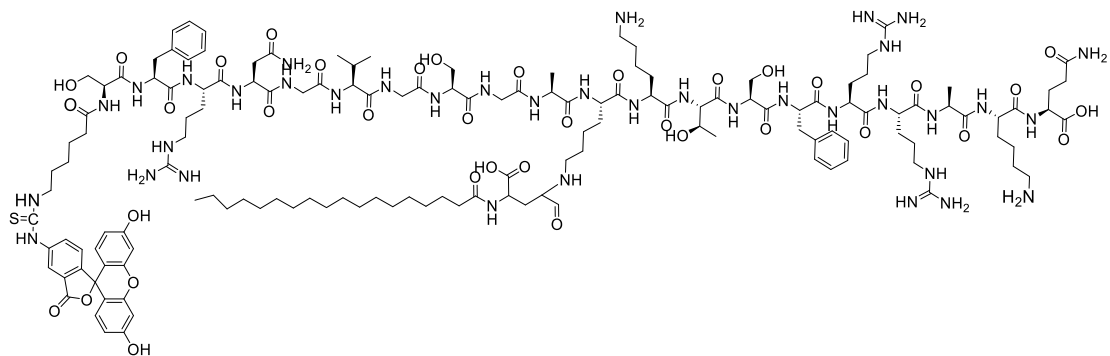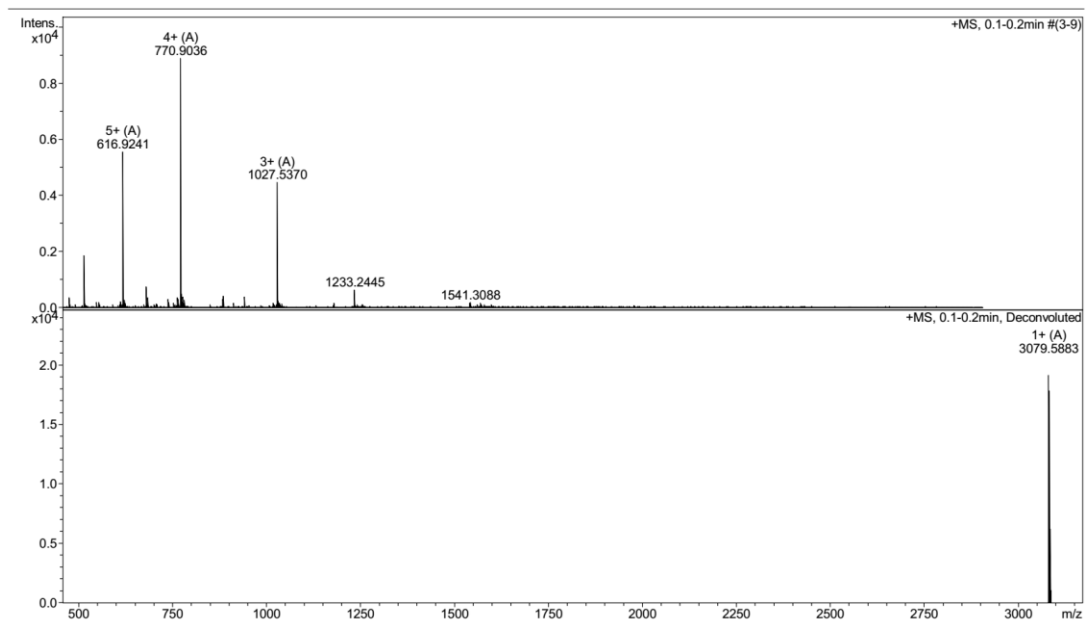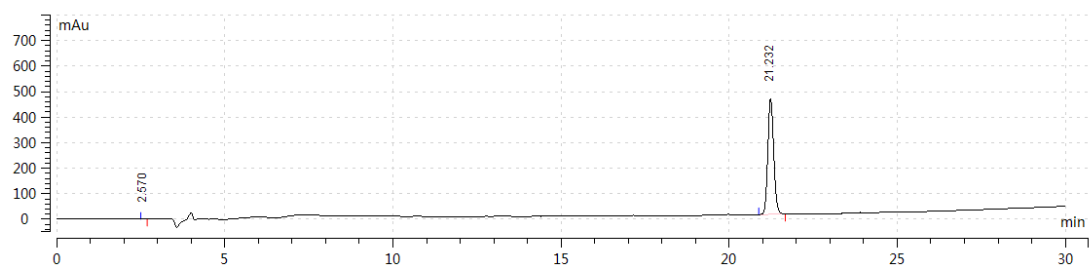

## Cy7-mNPS

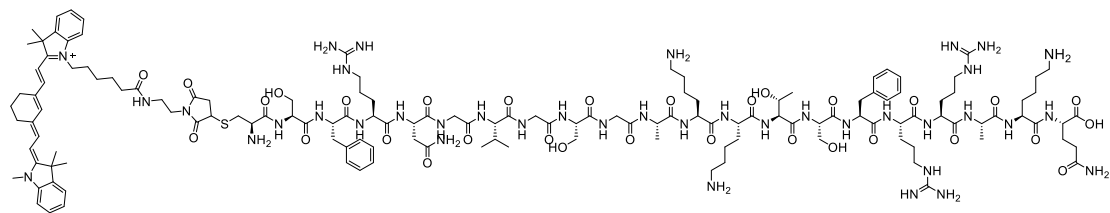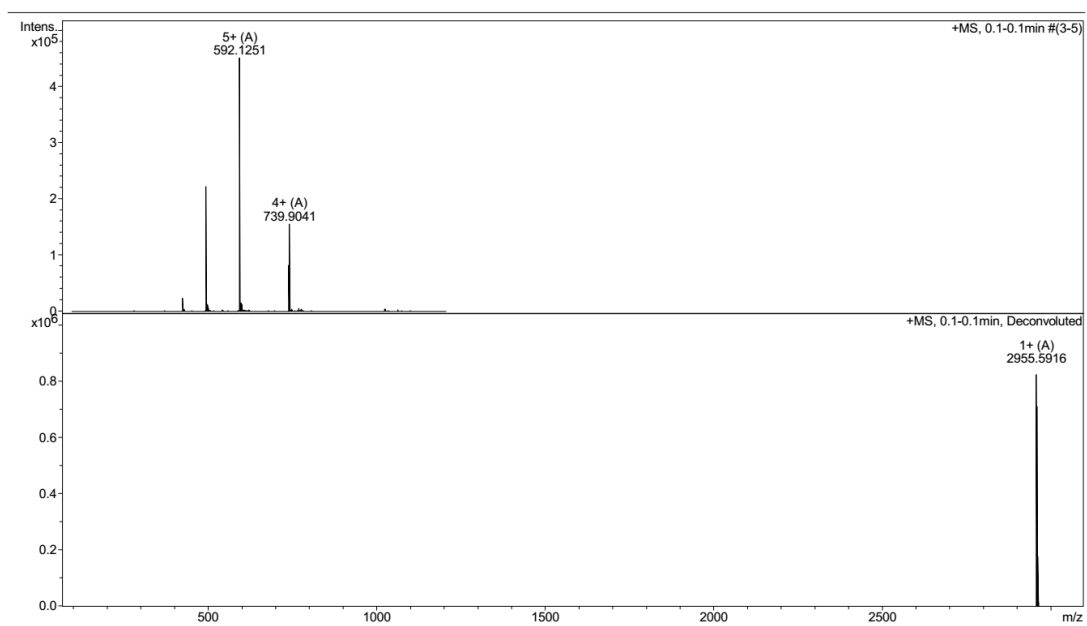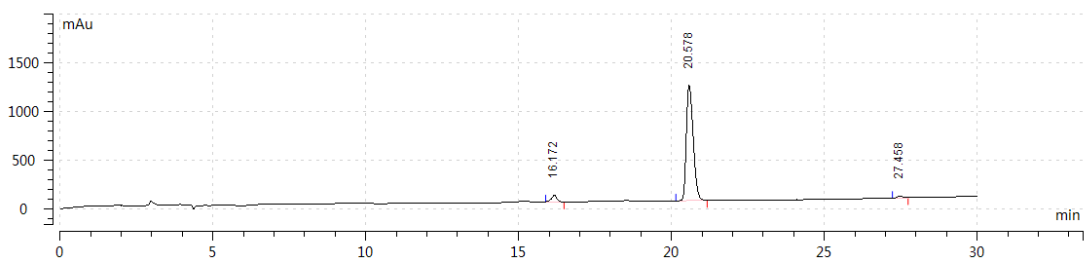

## Cy-7-M-3

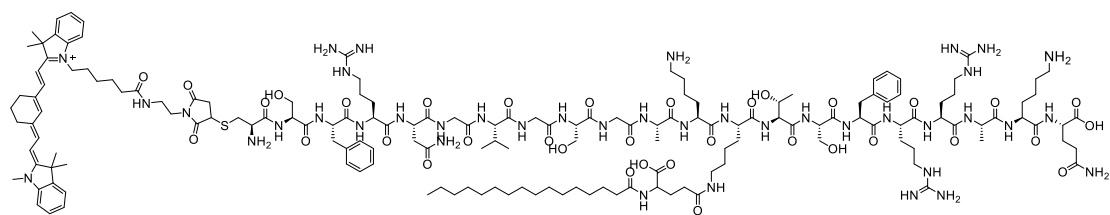

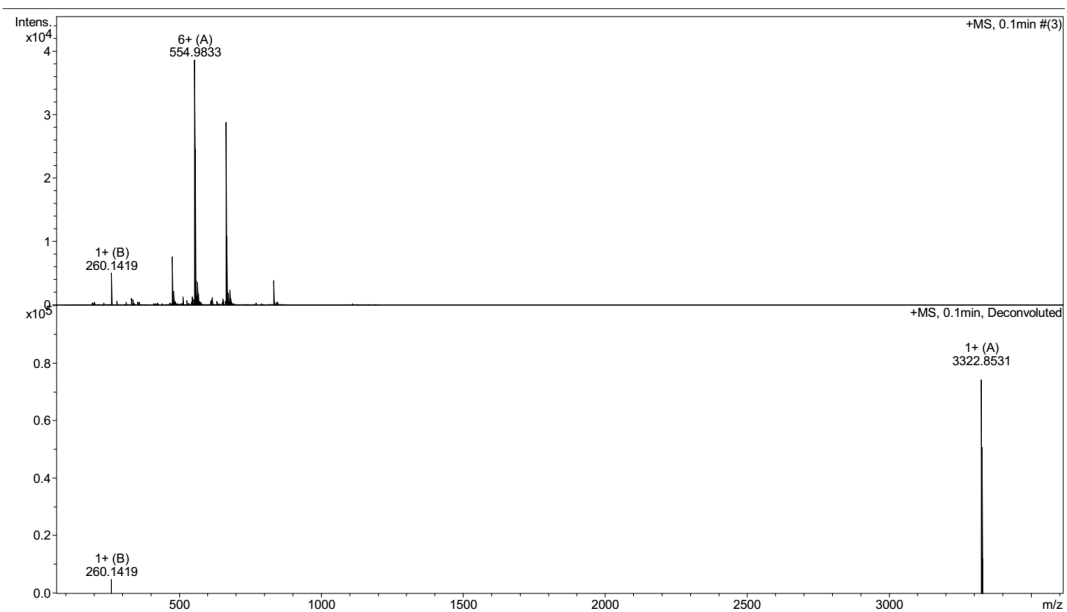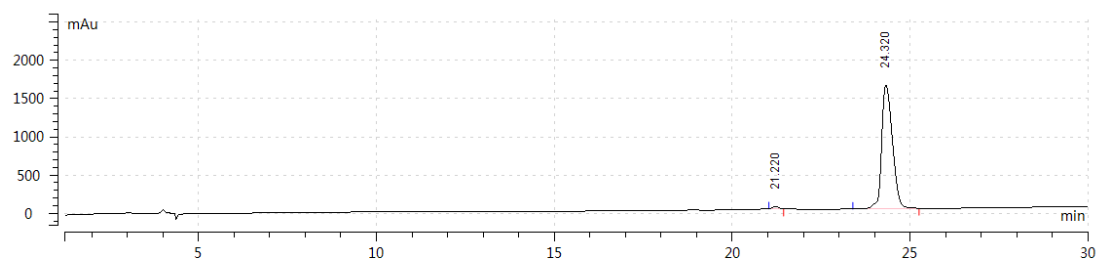

Supplement: d1bm00380a1.pdf [file d1bm00380a1.pdf]
